# Supplementary material
Source: PubMed Central journal article supplement (PMC7350614)
Supplement: NIHMS924804-supplement-Supp_Table_1.pdf [file NIHMS924804-supplement-Supp_Table_1.pdf]

| <b>LRP + Ascites</b> | <b>Race</b>  | <b>Age Average</b> | <b>Stage</b>    | <b>Histology Subtype</b>            | <b>Time to Recur (months)</b>                         |
|----------------------|--------------|--------------------|-----------------|-------------------------------------|-------------------------------------------------------|
| 18                   | 17 W<br>1 AA | 66.9<br>(40-76)    | 14 IIIC<br>4 IV | 15 Pap Serous<br>3 Mixed Epithelial | 15 (4-12 mo)<br>3(13-18 mo)                           |
| 7                    | 7W           | 64.1<br>(42-79)    | 6 IIIC<br>1 IV  | 5 Pap Serous<br>2 Mixed Epithelial  | 1 (<12 mo)<br>** 5 AWOD (>18 mo)<br>***1 no follow-up |
