# Supplementary material
Source: PubMed Central journal article supplement (PMC7350614)

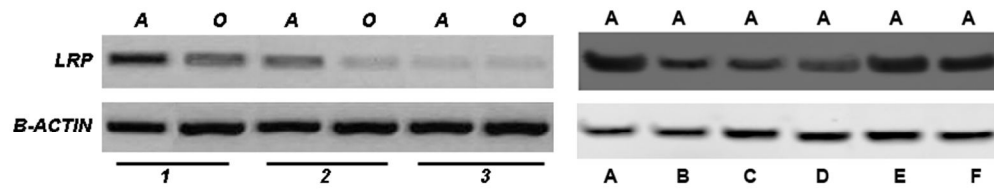

Supplement: NIHMS924804-supplement-Supp_Fig_1.pdf [file NIHMS924804-supplement-Supp_Fig_1.pdf]
